# Supplementary material for: Efficacy and Safety of Flexibly Dosed Esketamine Nasal Spray Combined With a Newly Initiated Oral Antidepressant in Treatment-Resistant Depression: A Randomized Double-Blind Active-Controlled Study
Source: Atypon-hosted journal article supplement (doi:10.1176/appi.ajp.2019.19020172), 2019-05-21
Supplement: appi.ajp.2019.19020172.ds001.pdf [file appi.ajp.2019.19020172.ds001.pdf]

 


Psychiatry Online
